# Supplementary material
Source: Springer Nature journal article supplement (https://www.springermedizin.de/resource/supplementary/12981_2014_312_MOESM1_ESM.pdf/9603578)

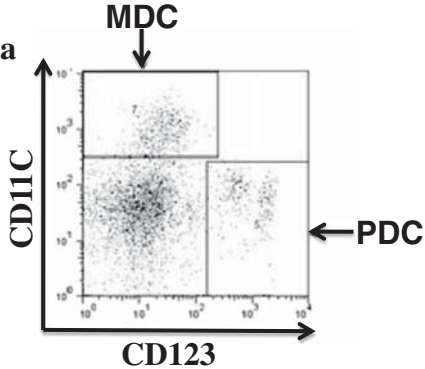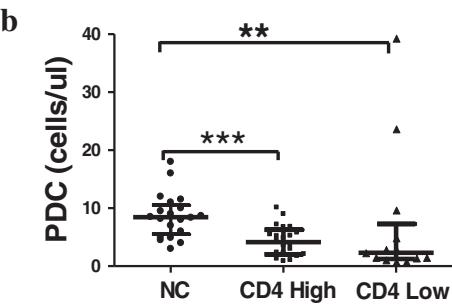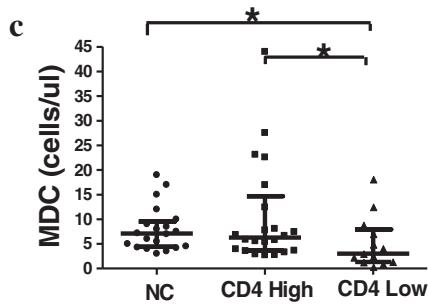

Supplement: MOESM1 [file 9603578]
